# Supplementary material
Source: Springer Nature journal article supplement (https://www.springermedizin.de/resource/supplementary/13256_2010_1814_MOESM3_ESM.pdf/9648520)

REAR

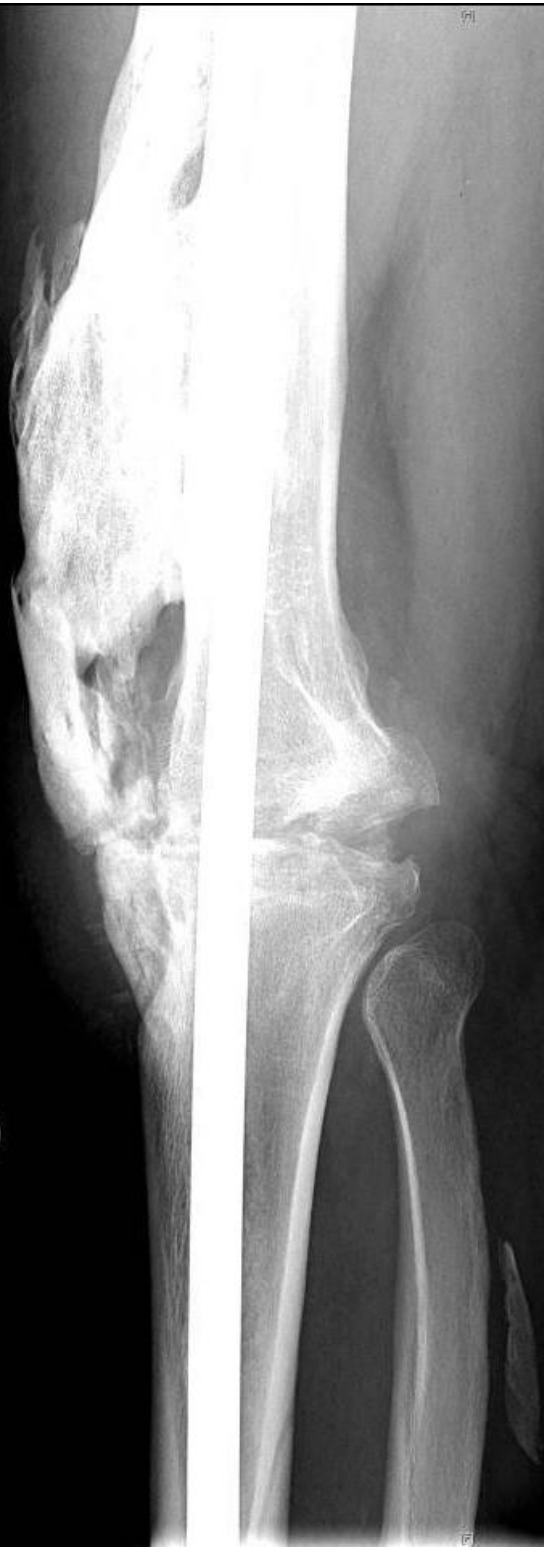

Supplement: MOESM3 [file 9648520]
